# 1 PhANNs, a fast and accurate tool and 2 web server to classify phage structural 3 proteins

4  
5 Vito Adrian Cantu<sup>1,4</sup>, Peter Salamon<sup>2,4</sup>, Victor Seguritan<sup>1,5</sup>, Jackson Redfield<sup>3,6</sup>, David Salamon<sup>2</sup>,  
6 Robert A. Edwards<sup>1,3,4</sup>, Anca M. Segall<sup>1,3,4,\*</sup>

7

8 1) Computational Science Research Center, San Diego State University, San Diego,  
9 92182, USA

10 2) Department of Mathematics and Statistics, San Diego State University, San Diego,  
11 92182, USA

12 3) Department of Biology, San Diego State University, San Diego, 92182, USA

13 4) Viral Information Institute, San Diego State University, San Diego, 92182, USA

14 5) Current address: Experian, 475 Anton Blvd., Costa Mesa, CA 92626

15 6) Current address: Inova Diagnostics, 9900 Old Grove Rd., San Diego, CA 92131

16

## 17 Abstract

18 For any given bacteriophage genome or phage sequences in metagenomic data sets, we are  
19 unable to assign a function to 50-90% of genes. Structural protein-encoding genes constitute a  
20 large fraction of the average phage genome and are among the most divergent and difficult-to-  
21 identify genes using homology-based methods. To understand the functions encoded by  
22 phages, their contributions to their environments, and to help gauge their utility as potential  
23 phage therapy agents, we have developed a new approach to classify phage ORFs into ten  
24 major classes of structural proteins or into an “other” category. The resulting tool is named  
25 PhANNs (Phage Artificial Neural Networks). We built a database of 538,213 manually curated

26 phage protein sequences that we split into eleven subsets (10 for cross-validation, one for  
27 testing) using a novel clustering method that ensures there are no homologous proteins  
28 between sets yet maintains the maximum sequence diversity for training. An Artificial Neural  
29 Network ensemble trained on features extracted from those sets reached a test  $F_1$ -score of  
30 0.875 and test accuracy of 86.2%. PhANNs can rapidly classify proteins into one of the ten  
31 classes, and non-phage proteins are classified as “other”, providing a new approach for  
32 functional annotation of phage proteins. PhANNs is open source and can be run from our web  
33 server or installed locally.

## 34 Author Summary

35 Bacteriophages (phages, viruses that infect bacteria) are the most abundant biological entity on  
36 Earth. They outnumber bacteria by a factor of ten. As phages are very different within them and  
37 from bacteria, and we have comparatively few phage genes in our database, we are unable to  
38 assign function to 50%-90% of phage genes. In this work, we developed PhANNs, a machine  
39 learning tool that can classify a phage gene as one of ten structural roles, or “other”. This  
40 approach does not require a similar gene to be known.

## 41 Introduction

42 Bacteriophages (phages) are the most abundant biological entity on the Earth (1). They  
43 modulate microbial communities by lysing specific components of microbiomes. Via  
44 transduction and/or lysogeny, they mediate horizontal transfer of genetic material such as  
45 virulence factors (2), metabolic auxiliary genes (3), photosystems and other genes to enhance  
46 photosynthesis(4), and phage production in general, by providing the host with immunity from  
47 killing by other phages. Temperate phages can become part of the host genome as prophages;  
48 most bacterial genomes contain at least one, and often multiple, prophages (5,6) .

49

50 Phage structures (virions) are composed of proteins that encapsulate and protect their  
51 genomes. The structural proteins (or virion proteins) also recognize the host, bind to it and  
52 deliver the phage's genome into the host's cell. Phage proteins, especially structural ones, vary  
53 widely between phages and phage groups, so much so that sequence identity-based methods  
54 to assign gene function fail frequently: we are currently unable to assign function to 50-90% of  
55 phage genes(7). Experimental methods such as protein sequencing, mass spectrometry,  
56 electron microscopy, or crystallography, in conjunction with antibodies against individual  
57 proteins, can be used to identify structural proteins but are expensive and time-consuming. A  
58 fast and easy-to-use computational approach to predict and classify phage structural proteins  
59 would be highly advantageous as part of pipelines for identifying functional roles of proteins of  
60 bacteriophage origins. The current increased interest in using phages as therapeutic agents  
61 (8,9) demands annotations for as high as possible a fraction of each phage genome, even if  
62 they are only provisional.

63

64 Machine learning has been used to attack similar biological problems. In 2012, Seguritan et al.  
65 (10) developed an Artificial Neural Network (ANN) that used normalized amino acid frequencies  
66 and the theoretical isoelectric point to classify viral proteins as structural or not structural with  
67 85.6% accuracy. These ANNs were trained with proteins of viruses from all three domains of  
68 life. They also trained two distinct ANNs to classify phage capsid versus phage non-capsid and  
69 phage "tail associated" versus phage "non-tail-associated" proteins. Subsequently, several  
70 groups have used different machine learning approaches to improve the accuracy of  
71 predictions. The resulting tools are summarized in **Table 1**.

72

73 Each of these previous approaches has important limitations: 1) The classification is limited to  
74 two classes of proteins (e.g., "capsid" or "not capsid"). 2) Training and testing sets were small  
75 (only a few hundred proteins in some cases), limiting the utility of the approaches beyond those

76 proteins used in testing. 3) Methods that rely on predicting secondary structure (e.g.,  
77 ViralPro(11)) are slow to run. In general, these newer methods have improved accuracy at the  
78 cost of lengthening the time required for training, or have used very small training and/or test  
79 sets.

80

81 Artificial Neural Networks (ANN) are proven universal approximators of functions in  $\mathbb{R}^n$ , (12)  
82 including the mathematical function that maps features extracted from a phage protein  
83 sequence to its structural class. We have constructed a manually-curated database of phage  
84 structural proteins and have used it to train a feed-forward ANN to assign any phage protein to  
85 one of eleven classes (ten structural classes plus a catch-all class labeled "others").

86 Furthermore, we developed a web server where protein sequences can be uploaded for  
87 classification. The full database, as well as the code for PhANNs and the webserver, are

88 available for download at <http://edwards.sdsu.edu/phanns> and <https://github.com/Adrian-Cantu/>

89 [PhANNs](#)

## 90 Methods

### 91 Database

92 In this work, we generated two complementary protein databases, "classes" and "others". The  
93 "classes" database contains curated sequences of ten phage structural roles (Major capsid,  
94 Minor capsid, Baseplate, Major tail, Minor tail, Portal, Tail fiber, Tail shaft, Collar, and Head-Tail  
95 joining). The "others" database contains all phage ORFs that do not encode proteins annotated  
96 as "structural" or as any of the 10 categories above.

#### 97 The database of "classes"

98 Sequences from the ten structural classes were downloaded from NCBI's protein database

99 using a custom search for the class title (the queries are in the “ncbi\_get\_structural.py” script in  
100 the GitHub repository). We manually removed all sequences whose description didn't fit the  
101 corresponding class.

## 102 The "others" database

103 To generate a database for the "others" class, all available phage genomes (8,238) were  
104 downloaded from GenBank on 4/13/19. ORFs were found using the GenBank PATRIC(13)  
105 server with the phage recipe(14). Sequences annotated as structural or any of the ten classes  
106 were removed during manual curation. Furthermore, the remaining sequences were de-  
107 replicated at 60% together with sequences in the “classes” database using CD-hit(15). Any  
108 phage ORF that clustered with a sequence from the "classes" database was removed from the  
109 "others" database.

## 110 Training, test, and validation split

111 Each class was clustered at 40% using CD-hit and split into eleven sets (10 for cross validation  
112 and one for testing, as shown in **Figure 1**). Once the clusters were determined, to prevent loss  
113 of the sequence diversity available within the clusters, which is essential for optimal training, the  
114 clusters were expanded by adding back *within* each set all the representatives of that set  
115 (described in Figure 1). Subsequently, the sets corresponding to each structural class were  
116 merged. We named the generated sets 1D-10D and TEST. Splitting the database this way  
117 ensures that the different sets share no homologous proteins, yet recapture all the sequence  
118 diversity present in each class. Finally, 100% dereplication was performed to remove identical  
119 sequences (See **Table 2**). The effect of the cluster expansion on performance is explored in  
120 **Figures S1 and S2**.

## 121 Extraction of features

122 The frequency of each dipeptide (400 features) and tripeptide (8,000 features) was computed

123 for each ORF sequence in both the “classes” and “others” databases. As a potential time-saving  
124 procedure during neural net training while also permitting classification of more diverse  
125 sequences, each amino acid was assigned to one of seven distinct "side chain" chemical  
126 groups (**Table S1**). The frequency of the "side chain" 2-mers (49 features), 3-mers (343  
127 features), and 4-mer (2,401 features) was also computed. Finally, some extra features, namely  
128 isoelectric point, instability index(16) (whether a protein is likely to degrade rapidly), ORF length,  
129 aromaticity(17) (relative frequency of aromatic amino acids) , molar extinction coefficient (how  
130 much light the protein absorbs) using two methods (assuming reduced cysteins or disulfide  
131 bonds), hydrophobicity, GRAVY(18) index (average hydrophathy) and molecular weight, were  
132 computed using Biopython(19). All 11,201 features were extracted from each of 538,213 protein  
133 sequences. The complete training data set can be downloaded from the web server  
134 (<https://edwards.sdsu.edu/phanns>).

## 135 ANN architecture and training

136 We used Keras(20) with the TensorFlow(21) back-end to train eleven distinct ANN models using  
137 a different subset of features. We named the models to indicate which feature sets were used in  
138 training: composition of 2-mers/dipeptides (di), 3-mers /tripeptides (tri) or 4-mer/tetrapeptide  
139 (tetra), or side chain groups (sc) (as shown in **Table S1**), and whether we included the extra  
140 features (p) or not. A twelfth ANN model was trained using all the features (**Table S2**).

141

142 Each ANN consists of an input layer, two hidden layers of 200 neurons, and an output layer with  
143 11 neurons (one per class). A dropout function with 0.2 probability was inserted between layers  
144 to prevent overfitting. ReLU activation (to introduce non-linearity) was used for all layers except  
145 the output, where softmax was used. Loss was computed by categorical cross-entropy and the  
146 ANN is trained using the "opt" optimizer until 10 epochs see no training loss reduction. The  
147 model at the epoch with the lowest validation loss is used. Class weights inversely proportional  
148 to the number of sequences in that class were used.

## 149 10-fold cross-validation

150 Sets 1D to 10D (see **Figure 1**) were used to perform 10-fold cross-validation; ten ANNs were  
151 trained as described above sequentially using one set as the validation set and the remaining  
152 nine as the training set. The results are summarized in **Figures 2, 3, and 4**.

## 153 Web server

154 We developed an easy-to-use web server for users to upload and classify their own sequences.  
155 Although ANNs need substantial computational resources for training the model (between  
156 54,861 and 127,756,413 parameters need to be tuned, depending on the model), the trained  
157 model can make fast *de novo* predictions. Our web server can predict the structural class of an  
158 arbitrary protein sequence in seconds and assign all the ORFs in a phage genome to one of the  
159 11 classes in minutes. The application can also be downloaded and run locally for high-  
160 throughput queries or if privacy is a concern.

## 161 Results and discussion

162 We evaluated the performance of 120 ANNs (10 per model type) on their respective validation  
163 set. For each ANN, we computed the precision, recall, and  $F_1$ -score of the 11 classes. A  
164 “weighted average” precision, recall and  $F_1$ -score, where the score for each class is weighted by  
165 the number of proteins in that class (larger classes contribute more to the score) was computed.  
166 The weighted average is represented as a 12th class (**see Table S3**). This gives us ten  
167 observations for each combination of model type and class, which allows us to construct  
168 confidence intervals as those seen in **Figures 2, 3, and 4**.

169

170 **Figure 2** shows that all the models follow the same trend as to which classes they predict with  
171 higher or lower accuracy. Some classes of proteins, for example major capsids, collars, and

172 head-tail joining proteins, are predicted with high accuracy. On the other hand, the minor capsid  
173 and tail fiber protein classes seem to be intrinsically hard to predict with high accuracy  
174 irrespective of the model type used (**Figure 3**). One reason for this is the limited size of the  
175 training set: the minor capsid protein set is the smallest class, with only 581 proteins available  
176 for inclusion in our database. Even if the classes were weighted according to their size during  
177 training, it appears we do not have enough training examples to correctly identify this class.  
178 Furthermore, “minor capsid” is often misclassified as “portal” (**Figure 5**). This is probably an  
179 annotation bias, as there were about 800 proteins annotated as “portal (minor capsid)” in the  
180 raw sequences. When the ~800 proteins are analyzed with PhANNs, over 90% are predicted to  
181 be portal proteins. Although these were removed during manual curation of the training data  
182 sets, some (small fraction of) minor capsid proteins in our database may have been annotated  
183 as “minor capsid” by homology to one of those 800 sequences.

184

185 The predictive accuracy for a specific class of proteins is likely to be affected by the bias in the  
186 training datasets. The bias could be biological and/or due to a sampling bias. An example of the  
187 former is the tail fiber class: the tail fiber is one of the determinants of the host range of the  
188 virus, and is under strong evolutionary selective pressure (22–27). On the other hand, sampling  
189 bias may be introduced due to oversampling of certain types of phages, such as the thousands  
190 of mycobacterial phages isolated as part of the SEA-PHAGES project(28); many of which are  
191 highly related to each other.

192

193 Average validation  $F_1$ -scores range from 0.664 for the “di\_sc” model to 0.906 for the “all” model  
194 (**Figure 4**). Although the average validation  $F_1$ -score for the top three models “tri\_p” (0.897),  
195 “tetra\_sc\_tri\_p” (0.901), and “all” (0.906) are not significantly different from each other, we  
196 decided to use “tetra\_sc\_tri\_p” for the web server because, while it uses ~7% fewer features  
197 than “all” (10,409 vs 11,201), we expect that the tetra side chain features will be better than the  
198 tripeptide features at generalizing predictions and accessing greater sequence diversity.



199

200 Using the “tetra\_sc\_tri\_p” ensemble, we predicted the class of each sequence in the test set  
201 (47,879) by averaging the scores of each of the ten ANNs. Results are summarized in **Figure 5**.  
202 Doing this we reach a test  $F_1$ -score of 0.875 and accuracy of 86.2% over the eleven classes.

203

204 The performance of any machine learning system is limited by the availability and cost of  
205 training examples (29). This has resulted in top performing image and audio classification  
206 systems invariably augmenting their training data with synthetic examples created by applying  
207 semantically orthogonal transformations to the training set (slightly rotating or distorting an  
208 image, adding background noise to audio) (30,31). In bioinformatics, the current practice of de-  
209 replication moves us in exactly the opposite direction -- perfectly good samples cannot be used  
210 if their overlap with other samples is too high, leaving only one version of the biostring to learn,  
211 and thereby ignoring any variations. Our approach overcomes this failing by using all non-  
212 redundant data. By splitting the dataset into the training, validation and test sets after first de-  
213 replicating at 40%, we remove even slightly redundant samples and make sure that none of the  
214 performance is due to memorization rather than generalization. Augmenting the training set by  
215 expanding the clusters back out to all non-redundant samples is the novel idea we have  
216 introduced in the present paper as a way of increasing our training set size and hence our  
217 accuracy.

## 218 Conclusion

219 ANNs are a powerful tool to classify phage structural proteins when homology-based alignments  
220 do not provide usable functional predictions, such as “hypothetical” or “unknown function”. This  
221 approach will get more accurate as more and better characterized phage structural protein  
222 sequences, especially more divergent ones, are experimentally validated and become available  
223 for inclusion in our training sets. This method can also be applied to predicting the function of

224 unknown proteins of prophage origin in bacterial genomes. In the future, we plan to expand this  
225 approach to more protein classes and to viruses of eukaryotes and archaea.

## 226 Acknowledgments

227 **Funding** This research is based upon work supported by the Office of the Director of National  
228 Intelligence (ODNI), Intelligence Advanced Research Projects Activity (IARPA), via the Army  
229 Research Office (ARO) under cooperative Agreement Number W911NF-17-2-0105, and  
230 awarded as a partial subcontract to AMS. The views and conclusions contained herein are  
231 those of the authors and should not be interpreted as necessarily representing the official  
232 policies or endorsements, either expressed or implied, of the ODNI, IARPA, ARO, or the U.S.  
233 Government. The U.S. Government is authorized to reproduce and distribute reprints for  
234 Governmental purposes notwithstanding any copyright annotation thereon.

235

236 Victor Seguritan and Jackson Redfield were supported by NSF DMS 0827278 Undergraduate  
237 BioMath Education grant awarded to AMS and PS.

238

239

240 ---

241

242

243 **Table 1. Summary of previous ML-based methods for classifying viral structural proteins**

244

| Reference             | Method                 | Target proteins                                              | Database size                                | Accuracy |
|-----------------------|------------------------|--------------------------------------------------------------|----------------------------------------------|----------|
| Seguritan et al. (10) | ANN                    | structural (all viruses) versus non-structural (all viruses) | 6,303 structural<br>7,500 non-structural     | 85.6%    |
| Seguritan et al. (10) | ANN                    | capsid versus non-capsid (phages only)                       | 757 capsid<br>10,929 non-capsid              | 91.3%    |
| Seguritan et al. (10) | ANN                    | Tail-associated versus non-tail (phages only)                | 2,174 tail<br>16,881 non-tail                | 79.9%    |
| Feng et al.(32)       | Naïve Bayes            | structural versus non-structural                             | 99 structural<br>208 non-structural          | 79.15%   |
| Zhang et al.(33)      | Ensemble Random Forest | structural versus non-structural                             | 253 structural<br>248 non-structural         | 85.0%    |
| Galiez et al.(11)     | SVM                    | capsid versus non-capsid                                     | 3,888 capsid<br>4,071 non-capsid             | 96.8%    |
| Galiez et al.(11)     | SVM                    | tail versus non-tail                                         | 2,574 tail<br>4,095 non-tail                 | 89.4%    |
| Manavalan et al. (34) | SVM                    | structural versus non-structural                             | 129 structural<br>272 non-structural         | 87.0%    |
| This work             | ANN                    | Ten distinct phage structural classes plus “others”          | 168,660 structural<br>369,553 non-structural | 86.2%    |

245

246 ---

247

248

249

250 **Table 2. Database numbers** - Raw sequences were downloaded using a custom script

251 available at <https://github.com/Adrian-Cantu/PhANNs>. All datasets can be downloaded from the

252 web server. \*Numbers before and after removing sequences at least 60% identical to a protein

253 in the classes database.

254

| Class                   | Raw sequences  | After manual curation | After de-replication at 40 % | After expansion and de-replication at 100% |
|-------------------------|----------------|-----------------------|------------------------------|--------------------------------------------|
| Major capsid            | 112,987        | 105,653               | 1,945                        | 35,755                                     |
| Minor capsid            | 2,901          | 1,903                 | 261                          | 1,055                                      |
| Baseplate               | 75,599         | 19,293                | 401                          | 6,221                                      |
| Major tail              | 66,513         | 35,030                | 536                          | 7,704                                      |
| Minor tail              | 94,628         | 80,467                | 918                          | 18,002                                     |
| Portal                  | 210,064        | 189,143               | 2,310                        | 59,745                                     |
| Tail fiber              | 29,132         | 18,514                | 1,222                        | 7,256                                      |
| Tail shaft              | 37,885         | 35,570                | 599                          | 15,349                                     |
| Collar                  | 4,224          | 3,709                 | 339                          | 2,105                                      |
| Head-Tail joining       | 60,270         | 58,658                | 1,317                        | 15,468                                     |
| <b>Total structural</b> | <b>694,203</b> | <b>547,940</b>        | <b>9,848</b>                 | <b>168,660</b>                             |
| Others                  | 733,006        | 643,735/643,380*      | 106,004                      | 369,553                                    |

255

256 ---

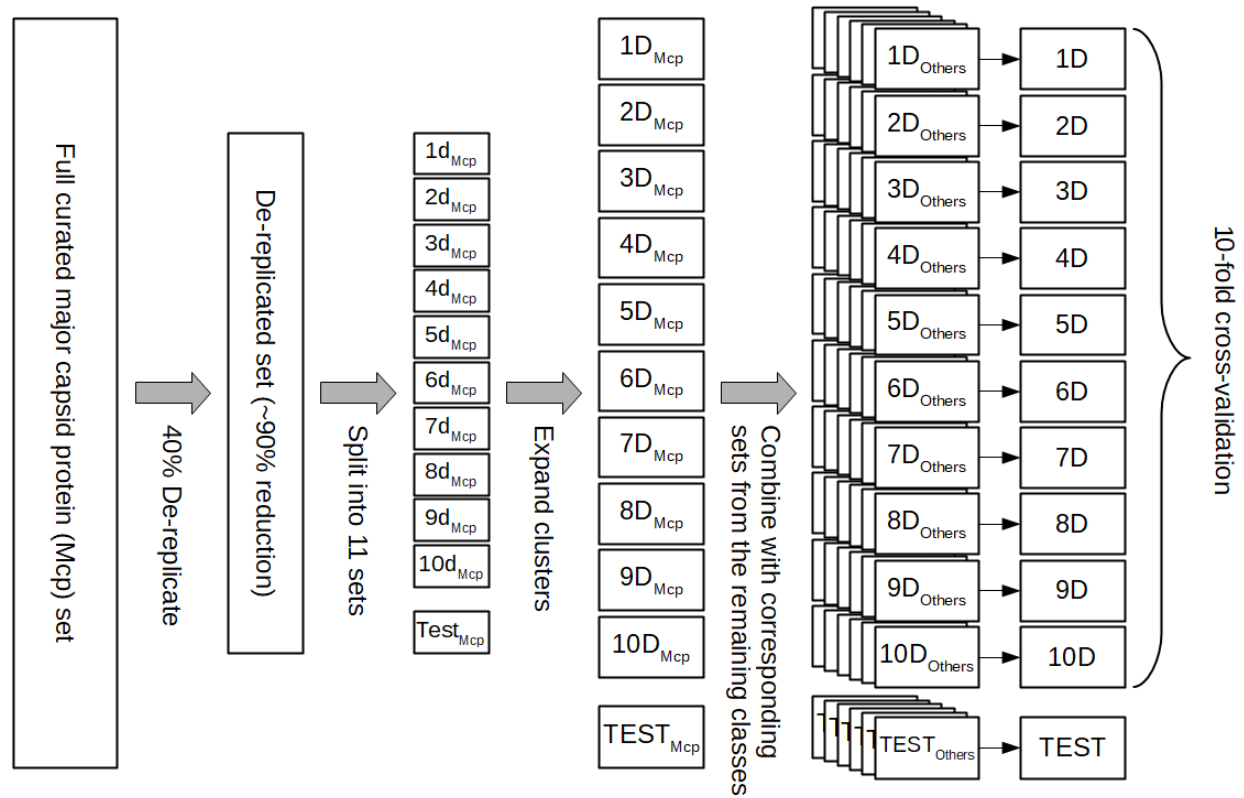

257

258 **Figure 1 . Non homologous database split** - To ensure that no homologous sequences are  
 259 shared between the test, validation, and training sets the sequences from each class (Major  
 260 capsid proteins in this figure) were de-replicated at 40%. In the de-replicated set, no two  
 261 proteins have more than 40% identity and each sequence is a representative of a larger cluster  
 262 of related proteins. The de-replicated set is then randomly partitioned into eleven equal size  
 263 subsets, (1d<sub>Mcp</sub>-10d<sub>Mpc</sub> plus Test<sub>Mpc</sub>). Those subsets are expanded by replacing each sequence  
 264 with all the sequences in the cluster it represents (subsets 1D<sub>Mpc</sub>-10D<sub>Mpc</sub> plus TEST<sub>Mpc</sub>).  
 265 Analogous subsets are generated for the remaining ten classes and corresponding subsets are  
 266 combined to generate the subsets used for 10-fold cross-validation and testing (1D-10D and  
 267 TEST).

268 ---

269

270

271

272

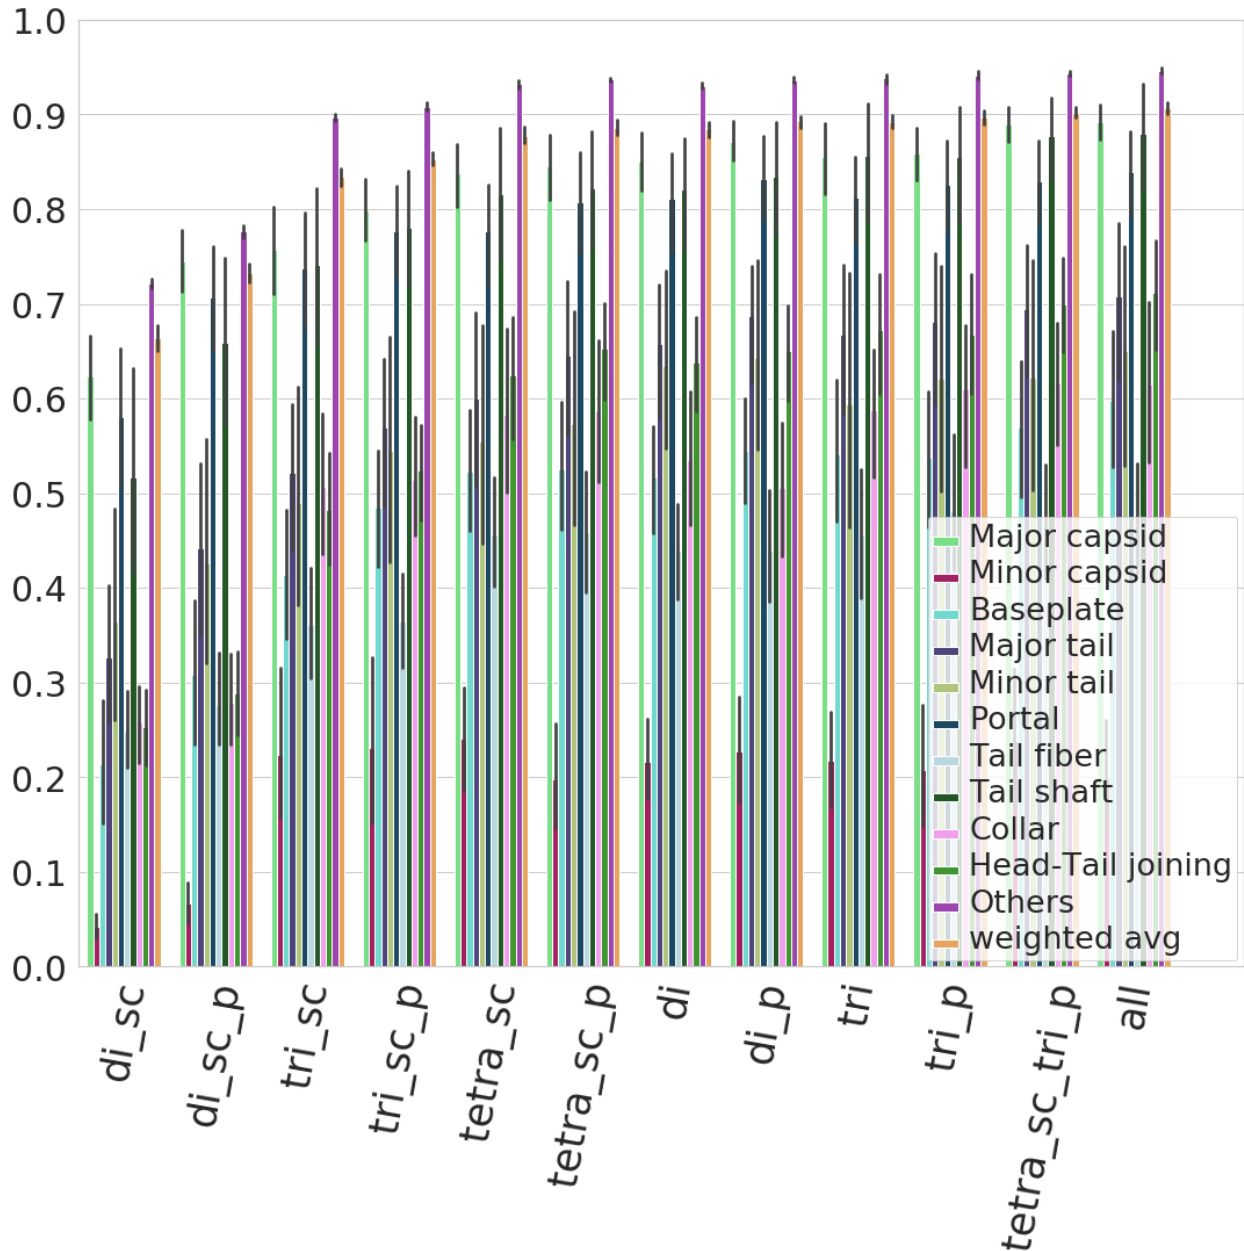

273

274

275 **Figure 2. Model-specific F<sub>1</sub> score** - F<sub>1</sub> scores (harmonic mean of precision and recall) for each

276 model/class combination. All models follow similar trends as to which classes are more or less

277 difficult to classify correctly. Error bars represent the 95% confidence intervals.

278 ---

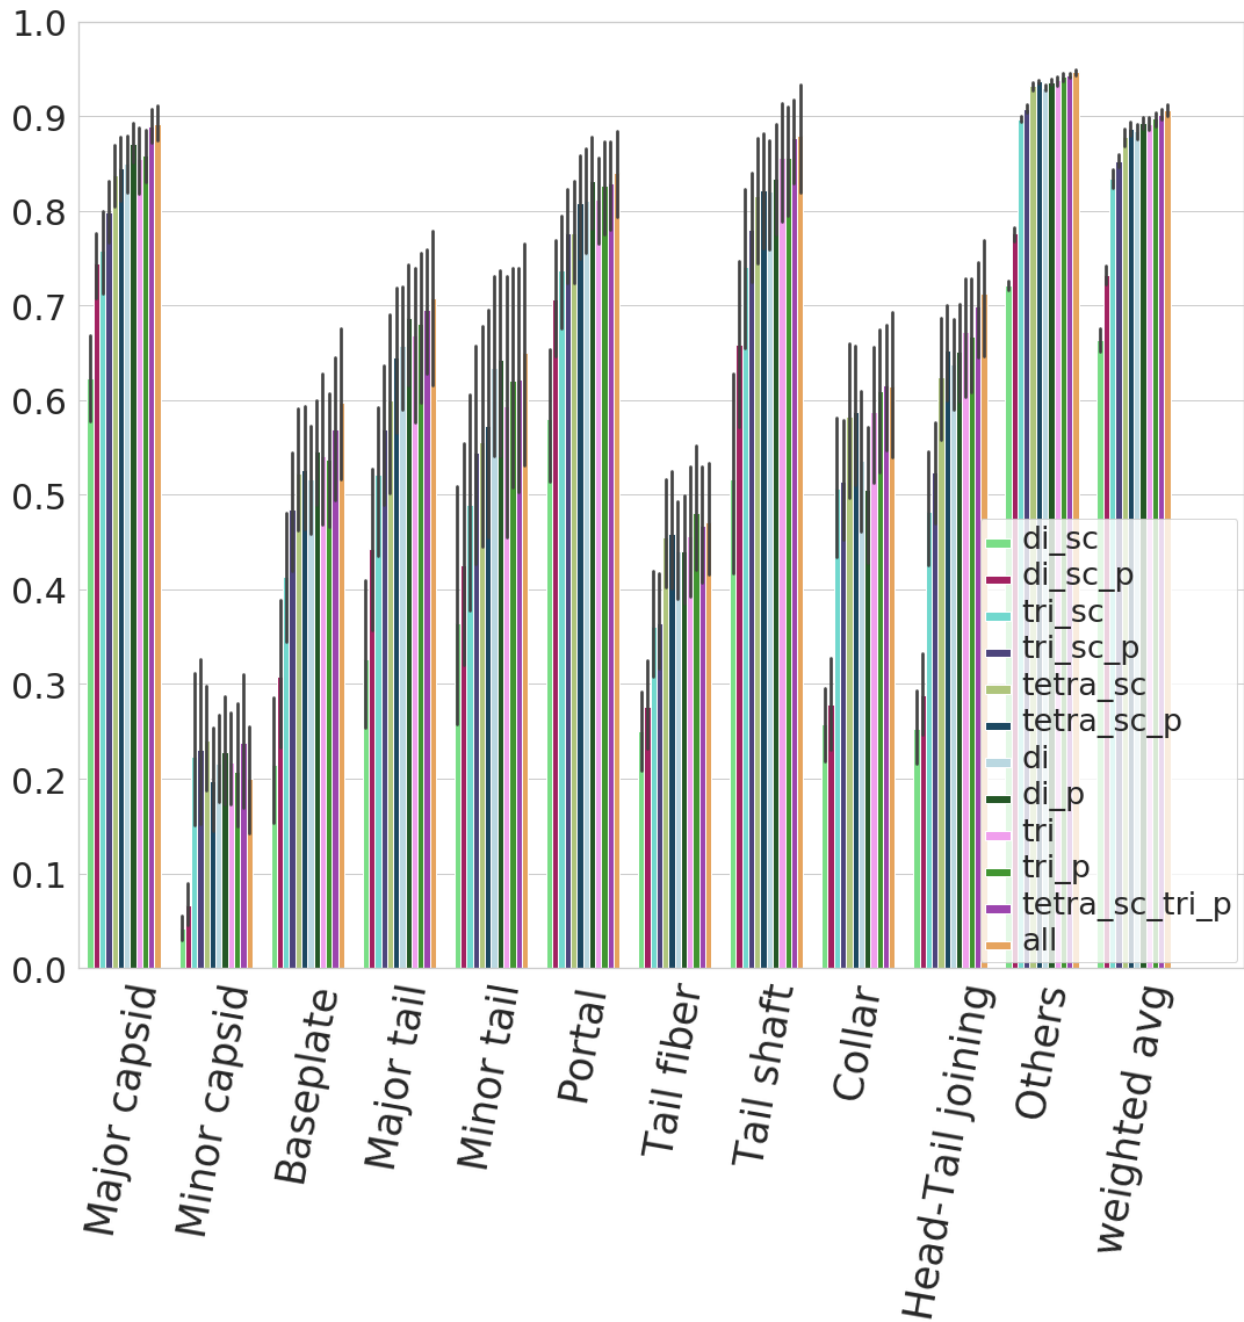

279

280

281 **Figure 3. Class-specific  $F_1$  score** -  $F_1$  scores (harmonic mean of precision and recall) for each

282 model/class combination. Some classes, such as minor capsid, tail fiber, or minor tail, are

283 harder to classify correctly irrespective of the model used. Error bars represent the 95%

284 confidence intervals.

285 ---

286

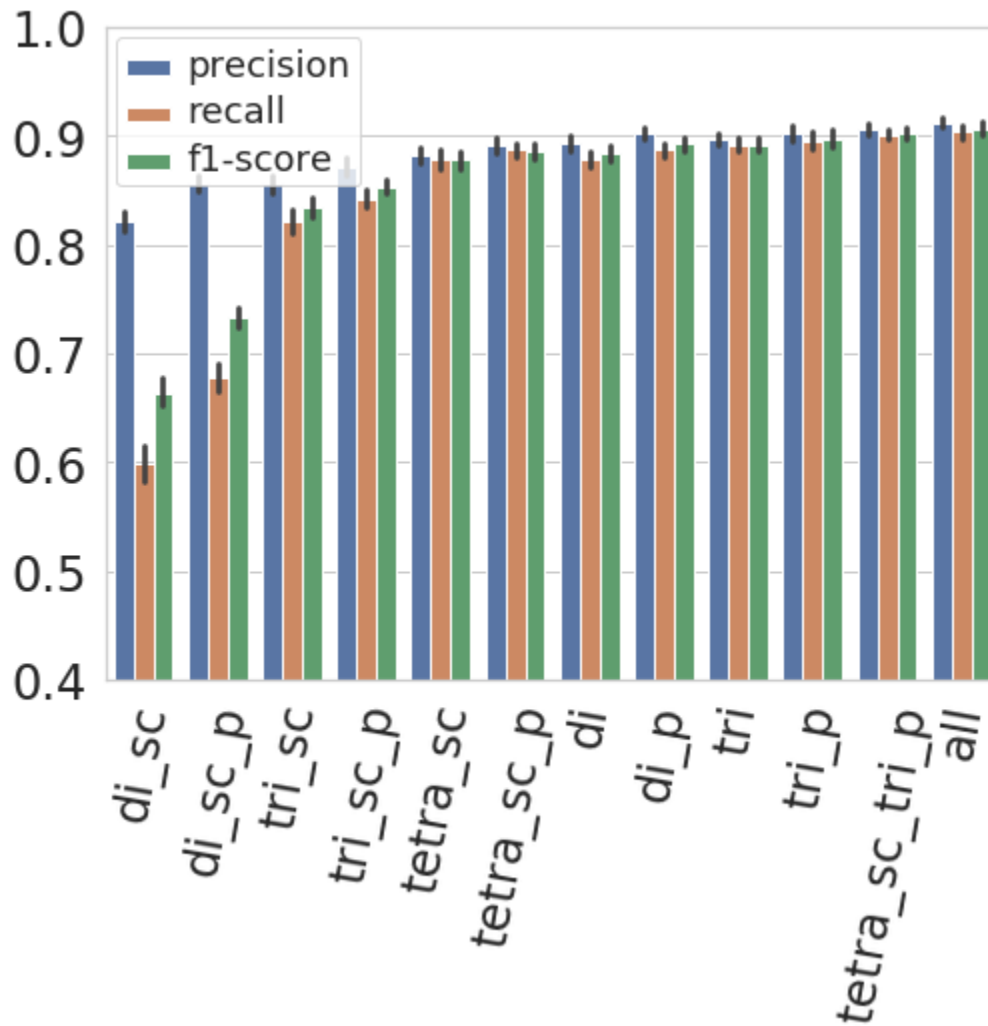

287

288 **Figure 4. Model-specific weighted average scores** - Precision, recall, and  $F_1$  scores for all

289 Models. Precision is higher in all models as the “others” class is the largest and easiest to

290 classify correctly. Error bars represent the 95% confidence intervals.

291

292 ---

293



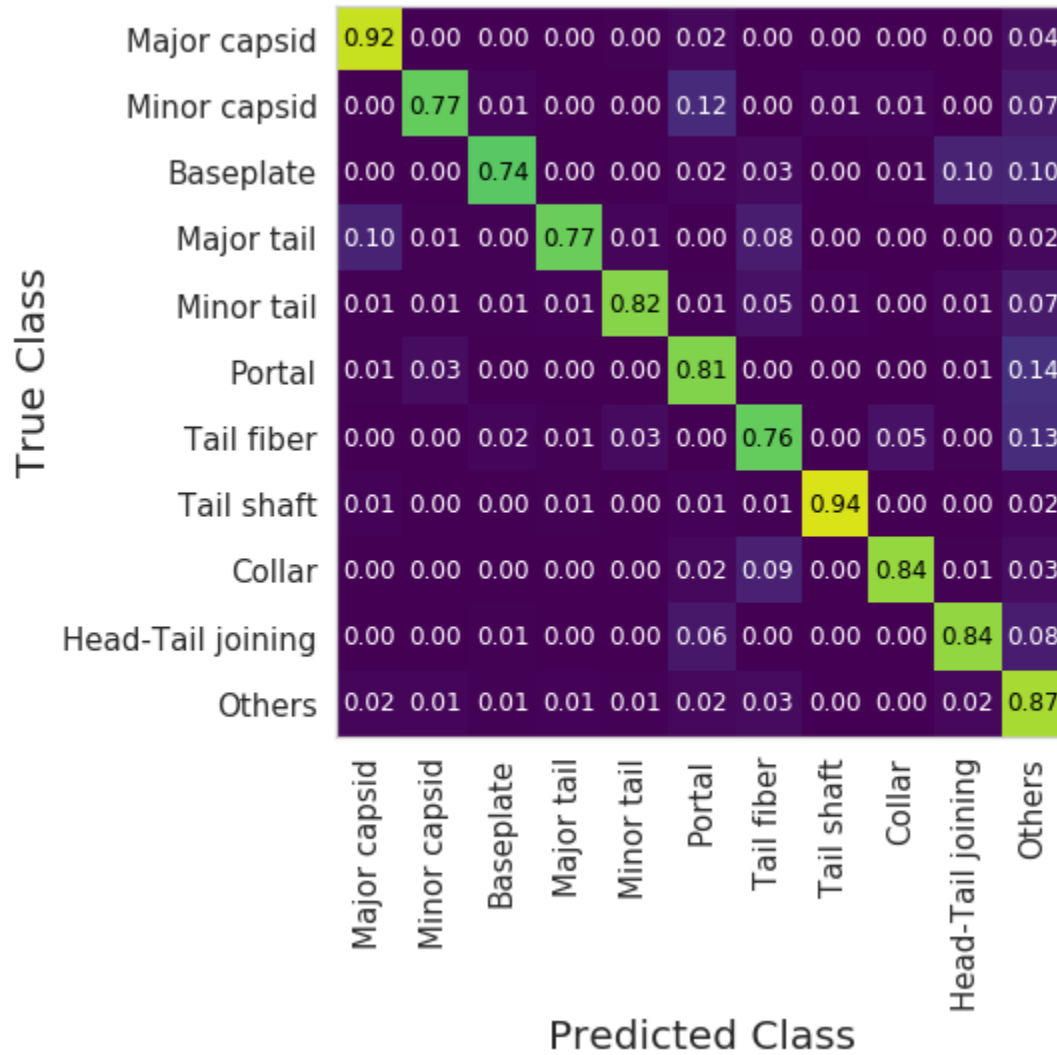

294

295 **Figure 5. Confusion matrix using the “tetra\_sc\_tri\_p” model** - Each row shows the  
 296 proportional classification of test sequences from a particular class. A perfect classifier would  
 297 have 1 on the diagonal and 0 elsewhere. In general, a protein that is misclassified is predicted  
 298 as “others”.

299 ---

300

301

302 **Table S1** - Side chain groupings

|                 |           |
|-----------------|-----------|
| Hydrophobic     | A,I,L,M,V |
| Hydrophilic     | N,Q,S,T   |
| Small turn      | G,P       |
| Disulfide       | C         |
| Positive charge | H,K,R     |
| Negative charge | D,E       |
| Aromatic        | F,W,Y     |

303

304

305

306

307 **Table S2 - Feature types included in each of the 12 models. di - 2-mer/dipeptide**

308 composition; **tri** - 3-mer/tripeptide composition; **tetra** - 4-mer/tetrapeptide composition; **sc** - side-  
 309 chain grouping; **p** - plus all the extra features [isoelectric point, instability index (whether a  
 310 protein is likely to be degraded rapidly), ORF length, aromaticity (relative frequency of aromatic  
 311 amino acids), molar extinction coefficient (how much light a protein absorbs) using two methods  
 312 (assuming reduced cysteines or disulfide bonds), hydrophobicity, GRAVY index (average  
 313 hydropathy), and molecular weight, as computed using Biopython].

314

315

| Model          | di | tri | di_sc | tri_sc | tetra_sc | p |
|----------------|----|-----|-------|--------|----------|---|
| di_sc          |    |     | x     |        |          |   |
| di_sc_p        |    |     | x     |        |          | x |
| tri_sc         |    |     |       | x      |          |   |
| tri_sc_p       |    |     |       | x      |          | x |
| tetra_sc       |    |     |       |        | x        |   |
| tetra_sc_p     |    |     |       |        | x        | x |
| di             | x  |     |       |        |          |   |
| di_p           | x  |     |       |        |          | x |
| tri            |    | x   |       |        |          |   |
| tri_p          |    | x   |       |        |          | x |
| tetra_sc_tri_p |    | x   |       |        | x        | x |
| all            | x  | x   | x     | x      | x        | x |

316

317 —

318

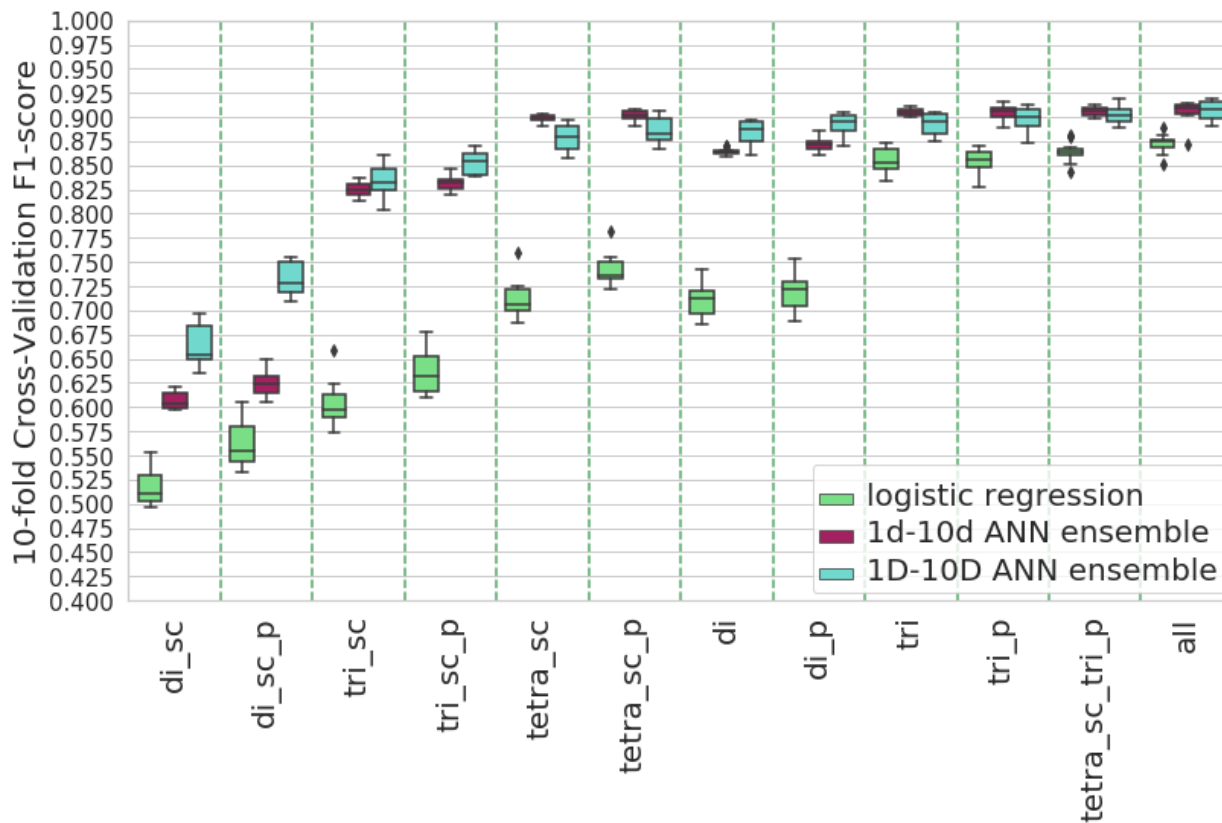

319

320 **Figure S1 - Comparison of the validation weighted average F<sub>1</sub>-score of three models on**

321 **the same feature sets** - We compared our ANN ensemble trained on 1D-10D sets against a

322 logistic regression trained on the 1D-10D sets and an ANN ensemble trained on the 1d-10d sets

323 (40% dereplication, without cluster expansion --see Methods). The ANN ensembles perform

324 significantly better than the logistic regression. Error bars represent 0.95 confidence intervals.

325

326 ---

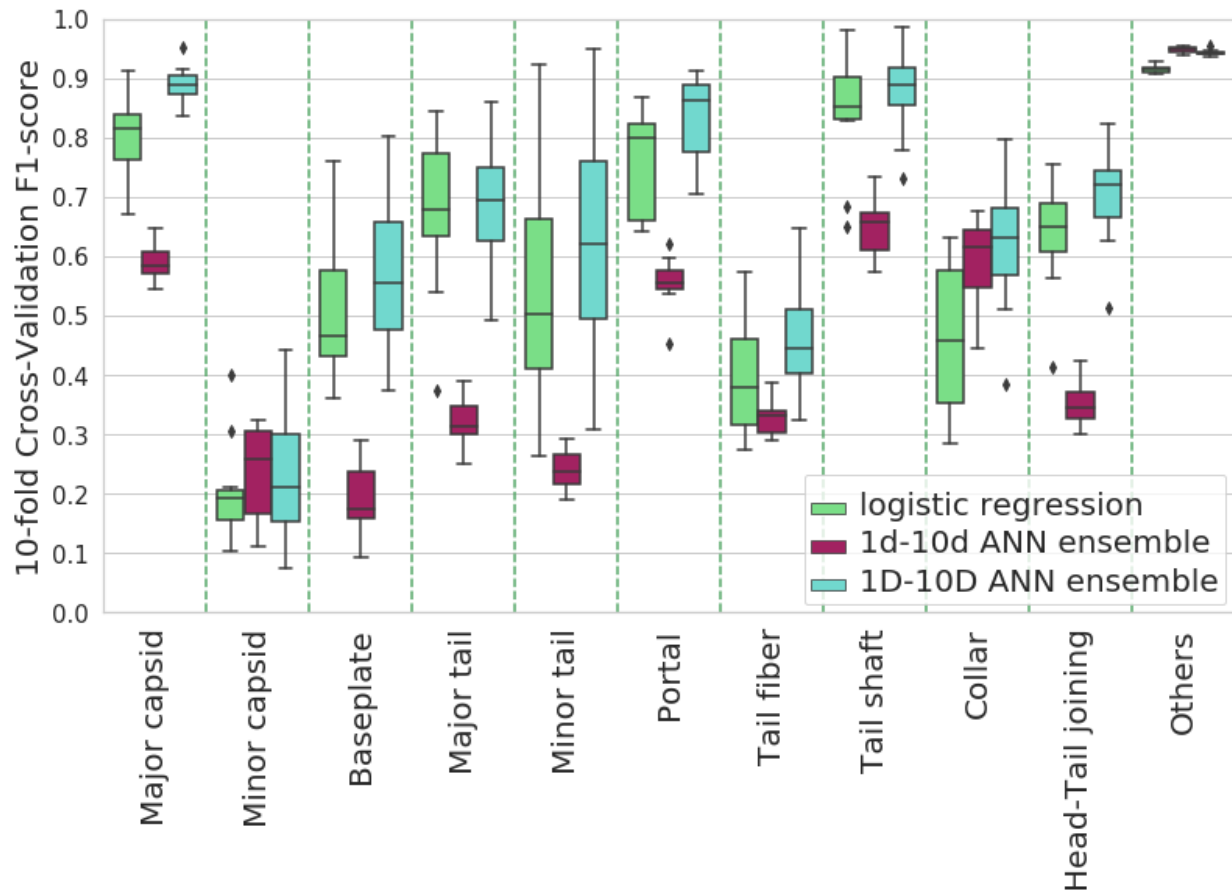

327

328 **Figure S2 Per class comparison of the validation F<sub>1</sub>-score of three models on the**  
329 **“tetras\_sc\_tri\_p feature” set -** In the structural classes, the 1D-q0D ANN ensemble performs  
330 slightly better than the logistic regression and significantly better than the 1d-10d ANN  
331 ensemble. In the “others” class (by much the largest), 1D-10D ANN ensemble performs as well  
332 as 1d-10d ANN and better than logistic regression. Error bars represent 0.95 confidence  
333 intervals.

334 ---

335

336

## 337 References

338

- 339 1. Cobián Güemes AG, Youle M, Cantú VA, Felts B, Nulton J, Rohwer F. Viruses as Winners  
340 in the Game of Life. *Annu Rev Virol*. 2016 Sep 29;3(1):197–214.
- 341 2. Waldor MK, Mekalanos JJ. Lysogenic conversion by a filamentous phage encoding  
342 cholera toxin. *Science*. 1996 Jun 28;272(5270):1910–4.
- 343 3. Breitbart M, Bonnain C, Malki K, Sawaya NA. Phage puppet masters of the marine  
344 microbial realm. *Nat Microbiol*. 2018 Jul;3(7):754–66.
- 345 4. Frank JA, Lorimer D, Youle M, Witte P, Craig T, Abendroth J, et al. Structure and function  
346 of a cyanophage-encoded peptide deformylase. *ISME J*. 2013 Jun;7(6):1150–60.
- 347 5. Knowles B, Silveira CB, Bailey BA, Barott K, Cantu VA, Cobián-Güemes AG, et al. Lytic to  
348 temperate switching of viral communities. *Nature*. 2016 Mar 24;531(7595):466–70.
- 349 6. Kang HS, McNair K, Cuevas DA, Bailey BA, Segall AM, Edwards RA. Prophage genomics  
350 reveals patterns in phage genome organization and replication. *bioRxiv*. 2017 Mar  
351 7;114819.
- 352 7. Edwards RA, Rohwer F. Viral metagenomics. *Nat Rev Microbiol*. 2005 Jun;3(6):504–10.
- 353 8. McCallin S, Sacher JC, Zheng J, Chan BK. Current State of Compassionate Phage  
354 Therapy. *Viruses*. 2019 Apr;11(4):343.
- 355 9. Hesse S, Adhya S. Phage Therapy in the Twenty-First Century: Facing the Decline of the  
356 Antibiotic Era; Is It Finally Time for the Age of the Phage? *Annu Rev Microbiol*.  
357 2019;73(1):155–74.
- 358 10. Seguritan V, Alves Jr. N, Arnoult M, Raymond A, Lorimer D, Burgin Jr. AB, et al. Artificial  
359 Neural Networks Trained to Detect Viral and Phage Structural Proteins. *PLoS Comput Biol*.

- 360 2012;8(8).
- 361 11. Galiez C, Magnan CN, Coste F, Baldi P. VIRALpro: A tool to identify viral capsid and tail  
362 sequences. *Bioinformatics*. 2016;32(9):1405–7.
- 363 12. Csáji BC. Approximation with Artificial Neural Networks. 2001;45.
- 364 13. Wattam AR, Davis JJ, Assaf R, Boisvert S, Brettin T, Bun C, et al. Improvements to  
365 PATRIC, the all-bacterial Bioinformatics Database and Analysis Resource Center. *Nucleic  
366 Acids Res*. 2017 04;45(D1):D535–42.
- 367 14. McNair K, Zhou C, Dinsdale EA, Souza B, Edwards RA. PHANOTATE: a novel approach  
368 to gene identification in phage genomes. *Bioinforma Oxf Engl*. 2019 Apr 25;
- 369 15. Li W, Godzik A. Cd-hit: a fast program for clustering and comparing large sets of protein or  
370 nucleotide sequences. *Bioinforma Oxf Engl*. 2006 Jul 1;22(13):1658–9.
- 371 16. Guruprasad K, Reddy BVB, Pandit MW. Correlation between stability of a protein and its  
372 dipeptide composition: a novel approach for predicting in vivo stability of a protein from its  
373 primary sequence. *Protein Eng Des Sel*. 1990 Dec 1;4(2):155–61.
- 374 17. Lobry JR, Gautier C. Hydrophobicity, expressivity and aromaticity are the major trends of  
375 amino-acid usage in 999 Escherichia coli chromosome-encoded genes. *Nucleic Acids Res*.  
376 1994 Aug 11;22(15):3174–80.
- 377 18. Kyte J, Doolittle RF. A simple method for displaying the hydropathic character of a protein.  
378 *J Mol Biol*. 1982 May 5;157(1):105–32.
- 379 19. Cock PJA, Antao T, Chang JT, Chapman BA, Cox CJ, Dalke A, et al. Biopython: freely  
380 available Python tools for computational molecular biology and bioinformatics. *Bioinforma  
381 Oxf Engl*. 2009 Jun 1;25(11):1422–3.
- 382 20. Chollet F, others. Keras [Internet]. 2015. Available from: <https://keras.io>
- 383 21. Martín Abadi, Ashish Agarwal, Paul Barham, Eugene Brevdo, Zhifeng Chen, Craig Citro, et  
384 al. TensorFlow: Large-Scale Machine Learning on Heterogeneous Systems [Internet].  
385 2015. Available from: <https://www.tensorflow.org/>
- 386 22. Drexler K, Dannull J, Hindennach I, Mutschler B, Henning U. Single mutations in a gene for

- 387 a tail fiber component of an Escherichia coli phage can cause an extension from a protein  
388 to a carbohydrate as a receptor. *J Mol Biol.* 1991 Jun 20;219(4):655–63.
- 389 23. Desplats C, Krisch HM. The diversity and evolution of the T4-type bacteriophages. *Res*  
390 *Microbiol.* 2003 May;154(4):259–67.
- 391 24. Medhekar B, Miller JF. Diversity-generating retroelements. *Curr Opin Microbiol.* 2007  
392 Aug;10(4):388–95.
- 393 25. Ciezki K, Murfin K, Goodrich-Blair H, Stock SP, Forst S. R-type bacteriocins in related  
394 strains of *Xenorhabdus bovienii*: Xenorhabdycin tail fiber modularity and contribution to  
395 competitiveness. *FEMS Microbiol Lett.* 2017;364(1).
- 396 26. Akusobi C, Chan BK, Williams ESCP, Wertz JE, Turner PE. Parallel Evolution of Host-  
397 Attachment Proteins in Phage PP01 Populations Adapting to *Escherichia coli* O157:H7.  
398 *Pharm Basel Switz.* 2018 Jun 20;11(2).
- 399 27. Benler S, Cobián-Güemes AG, McNair K, Hung S-H, Levi K, Edwards R, et al. A diversity-  
400 generating retroelement encoded by a globally ubiquitous *Bacteroides* phage. *Microbiome.*  
401 2018 23;6(1):191.
- 402 28. Jordan TC, Burnett SH, Carson S, Caruso SM, Clase K, DeJong RJ, et al. A Broadly  
403 Implementable Research Course in Phage Discovery and Genomics for First-Year  
404 Undergraduate Students. *mBio* [Internet]. 2014 Feb 4 [cited 2019 Nov 13];5(1). Available  
405 from: <https://www.ncbi.nlm.nih.gov/pmc/articles/PMC3950523/>
- 406 29. Halevy A, Norvig P, Pereira F. The Unreasonable Effectiveness of Data. *IEEE Intell Syst.*  
407 2009 Mar;24(2):8–12.
- 408 30. Kanda N, Takeda R, Obuchi Y. Elastic spectral distortion for low resource speech  
409 recognition with deep neural networks. In: 2013 IEEE Workshop on Automatic Speech  
410 Recognition and Understanding. 2013. p. 309–14.
- 411 31. Ciregan D, Meier U, Schmidhuber J. Multi-column deep neural networks for image  
412 classification. In: 2012 IEEE Conference on Computer Vision and Pattern Recognition.  
413 2012. p. 3642–9.



- 414 32. Feng P-M, Ding H, Chen W, Lin H. Naïve bayes classifier with feature selection to identify  
415 phage virion proteins. *Comput Math Methods Med.* 2013;2013.
- 416 33. Zhang L, Zhang C, Gao R, Yang R. An ensemble method to distinguish bacteriophage  
417 virion from non-virion proteins based on protein sequence characteristics. *Int J Mol Sci.*  
418 2015;16(9):21734–58.
- 419 34. Manavalan B, Shin TH, Lee G. PVP-SVM: Sequence-based prediction of phage virion  
420 proteins using a support vector machine. *Front Microbiol.* 2018;9(MAR).  
421
